# Supplementary material
Source: publisher site journal article supplement (https://www.spandidos-publications.com/7472/downloadSupplementary)
Supplement: Supplementary file 1 [file downloadSupplementary]

## Sheet: GSEA
Table SXIII. The results of gene sets enrichment analysis for genes ranked by logFC between the low- and high-expression groups of DEPP1.
	ID	Description	setSize	enrichmentScore	NES	pvalue	p.adjust	qvalues	rank	leading_edge	core_enrichment
HALLMARK_E2F_TARGETS	HALLMARK_E2F_TARGETS	HALLMARK_E2F_TARGETS	194	-0.689526	-2.83328	1e-10	1.19393e-09	7.54059e-10	4203	tags=79%, list=25%, signal=60%	9972/10248/203068/5411/9924/7157/6434/9126/10535/54556/4999/6941/8243/1633/29893/1786/64858/27338/83463/6749/5591/1965/8726/11051/204/9183/197335/4174/25842/10797/7398/5901/5426/7514/6839/7112/7283/10492/3978/9918/23165/11113/10212/1854/6426/5982/4683/147841/6119/1503/7374/7913/9221/5902/994/3835/4678/4609/81611/5425/6628/7884/6427/10528/3149/9238/4175/253714/4172/3925/10606/3159/4436/8914/580/11…
HALLMARK_EPITHELIAL_MESENCHYMAL_TRANSITION	HALLMARK_EPITHELIAL_MESENCHYMAL_TRANSITION	HALLMARK_EPITHELIAL_MESENCHYMAL_TRANSITION	196	0.71133	2.66639	1e-10	1.19393e-09	7.54059e-10	3260	tags=71%, list=19%, signal=58%	7857/9244/4256/7980/2006/6422/6424/9353/6586/6876/10398/2619/3569/10516/2199/26585/7057/4638/2247/4312/1809/4313/1307/8076/3908/59/7169/5999/6695/1634/6387/3487/2316/5806/25890/2192/4616/3371/633/4314/2669/1296/3486/2200/7078/4837/1292/1294/5054/7058/5021/6372/5159/1281/30008/7070/6444/388/1277/800/11167/26577/10979/50863/7076/5396/115908/4060/57692/2303/7424/2191/1293/1009/1278/1284/5118/6678/41…
HALLMARK_G2M_CHECKPOINT	HALLMARK_G2M_CHECKPOINT	HALLMARK_G2M_CHECKPOINT	188	-0.623261	-2.55799	1e-10	1.19393e-09	7.54059e-10	2758	tags=55%, list=16%, signal=47%	5426/7514/6839/6713/7112/10492/1871/22823/10212/6426/7150/10036/10762/10419/3619/9221/595/994/3835/4678/4609/1841/6427/3149/4175/4953/4172/3925/1736/3159/580/9184/1163/10592/23649/4001/5558/5885/10460/3930/10403/262/899/10051/5933/1869/8317/6491/9055/24137/6632/675/51203/26271/9232/4288/1063/8318/9156/5347/3832/29127/3161/4171/3838/11004/1111/10024/10293/2146/10926/9133/1164/1033/4751/11065/10733…
HALLMARK_MYC_TARGETS_V1	HALLMARK_MYC_TARGETS_V1	HALLMARK_MYC_TARGETS_V1	191	-0.606938	-2.49721	1e-10	1.19393e-09	7.54059e-10	5409	tags=80%, list=32%, signal=55%	328/6164/6634/10971/9045/3475/5887/23196/1933/2935/3192/7307/10155/2547/10054/5713/8454/6188/10146/28973/22916/57819/5634/4686/10236/1019/5250/3184/3608/2079/8669/26135/3615/23435/51690/1665/6434/3178/3183/10574/6626/7416/7411/4999/3068/5496/10907/5707/6723/7203/7027/6627/2739/10575/5690/5683/6428/6629/10856/52/4869/5230/5245/4706/54107/7965/51020/1965/6418/5478/6741/6599/5687/4174/8886/10935/318…
HALLMARK_MYOGENESIS	HALLMARK_MYOGENESIS	HALLMARK_MYOGENESIS	184	0.586396	2.17518	1.19393e-10	1.19393e-09	7.54059e-10	2836	tags=46%, list=17%, signal=39%	1674/845/2775/5740/3479/4842/4629/1410/6442/6876/70/5348/8912/4638/2247/3908/10580/88/3679/165/6649/7169/89/10290/26353/347/5837/1837/4684/4616/2273/3490/1675/3486/3316/8736/6525/6588/1292/1346/4151/11155/1281/22808/6444/1277/1756/6840/1760/948/187/2878/844/1293/1284/65055/58/5507/9260/1306/6678/10278/2702/25937/5569/2934/8082/1191/8038/1489/3757/4208/4046/115/6450/5816/6261/10174/10014/4209/5621…
HALLMARK_OXIDATIVE_PHOSPHORYLATION	HALLMARK_OXIDATIVE_PHOSPHORYLATION	HALLMARK_OXIDATIVE_PHOSPHORYLATION	182	-0.485187	-1.97085	1.89385e-07	1.57821e-06	9.96761e-07	6668	tags=74%, list=40%, signal=45%	4720/10884/1340/4711/4728/92609/7386/1353/4719/9550/1350/55288/4698/3030/51382/4729/8050/37/89941/2746/5447/2395/1632/7417/4723/36/2109/11331/4694/4190/38/7385/5162/4700/4697/26520/6183/29796/1528/2110/56993/4726/4976/481/1352/51606/4710/528/4708/27089/292/3052/54884/533/3028/3420/4717/4707/4714/4702/788/5250/4701/4712/6389/1349/7381/10989/7416/1431/64960/26517/10651/2821/1345/4709/1329/6832/2271…
HALLMARK_MTORC1_SIGNALING	HALLMARK_MTORC1_SIGNALING	HALLMARK_MTORC1_SIGNALING	192	-0.454515	-1.86947	2.58939e-06	1.84957e-05	1.16815e-05	3998	tags=50%, list=24%, signal=39%	3157/5464/2936/10989/5693/3099/2821/6917/10061/27071/5719/27346/3313/5701/7184/54843/7277/2597/1719/5033/5230/10197/5718/31/5478/5163/7167/2542/2805/5723/10797/81873/27101/6713/10213/7283/10963/8894/5052/23165/120/10987/10212/1649/26747/3156/5685/10682/7374/5706/6309/134429/5684/6510/441024/3422/3939/9136/3638/2023/3251/4860/9521/586/6513/9368/899/80777/30001/8624/26227/7108/47/6472/10622/3329/31…
HALLMARK_UV_RESPONSE_DN	HALLMARK_UV_RESPONSE_DN	HALLMARK_UV_RESPONSE_DN	136	0.528976	1.90192	3.95125e-06	2.46678e-05	1.55797e-05	3562	tags=42%, list=21%, signal=33%	773/10516/4131/3778/2202/5999/1843/5737/9863/10000/4052/5054/5159/1281/1277/23345/3488/3815/1278/273/50937/7436/5797/1902/5577/7049/5376/493/10486/10395/3037/11030/857/10659/1290/23266/3690/1601/8829/2908/6591/6383/10370/2697/7048/3667/8613/2274/3915/2534/6310/4853/4781/2869/8821/57178/5293
HALLMARK_MYC_TARGETS_V2	HALLMARK_MYC_TARGETS_V2	HALLMARK_MYC_TARGETS_V2	56	-0.631481	-2.12395	4.44021e-06	2.46678e-05	1.55797e-05	4641	tags=80%, list=27%, signal=58%	23223/10199/79077/1019/79050/6949/80324/54663/3099/92856/6723/64216/29078/6832/27346/4869/5245/51154/7965/10514/4174/8886/4839/7374/9221/4609/23160/6573/10528/9238/11335/9136/10196/51491/3177/51388/26354/5036/705/79711/3329/5347/4173/6652/10733
HALLMARK_PANCREAS_BETA_CELLS	HALLMARK_PANCREAS_BETA_CELLS	HALLMARK_PANCREAS_BETA_CELLS	35	0.743628	2.10643	7.17984e-06	3.58992e-05	2.26732e-05	1346	tags=43%, list=8%, signal=40%	2641/3642/4760/5122/1113/10590/5078/5126/6833/5063/50674/1641/10000/3670/6812
HALLMARK_APICAL_JUNCTION	HALLMARK_APICAL_JUNCTION	HALLMARK_APICAL_JUNCTION	189	0.466625	1.73594	0.000106211	0.000482779	0.000304913	2650	tags=33%, list=16%, signal=28%	1272/147/57863/9379/478/9353/2318/5010/72/10398/70/23114/4313/1307/88/253559/89/7122/10290/83700/143903/2200/10000/257194/7450/91624/7070/54413/57555/3680/1009/947/58/5175/5310/51148/1462/8910/7106/4628/2770/7216/8515/7059/6237/3757/55742/87/51466/1004/8174/3384/7045/5600/4478/5522/57463/10174/9672/8745/347902/7414/7412
HALLMARK_DNA_REPAIR	HALLMARK_DNA_REPAIR	HALLMARK_DNA_REPAIR	143	-0.413933	-1.62933	0.000529559	0.0022065	0.00139358	7250	tags=68%, list=43%, signal=39%	8731/6883/8721/10623/10063/25874/5432/5439/2071/51082/6834/9013/6881/79720/55290/54487/5422/1716/50808/404672/5430/7251/10959/56655/353/53343/10714/10134/286075/6118/129607/57804/5429/9978/51160/5433/10946/7936/124583/6621/6880/2965/22916/2959/30833/3615/7157/5436/6895/10978/5437/8086/65109/9883/51251/50484/6431/6749/5440/23204/1479/11051/5423/10189/3704/9328/5985/2958/3978/11047/1854/5898/5982/7…
HALLMARK_KRAS_SIGNALING_UP	HALLMARK_KRAS_SIGNALING_UP	HALLMARK_KRAS_SIGNALING_UP	196	0.433427	1.62468	0.000855938	0.00329207	0.0020792	2273	tags=26%, list=13%, signal=23%	6447/7166/29106/6616/1363/7476/3800/1149/9358/9945/8404/7102/55273/4803/347/4674/1437/2995/3486/10418/25960/56729/9892/12/6324/5396/9590/3290/220/23136/2791/5175/51129/5178/3624/2022/7852/2324/2115/3575/8854/83483/64123/27344/2162/3075/951/8829/5327/90865/9935
HALLMARK_ANGIOGENESIS	HALLMARK_ANGIOGENESIS	HALLMARK_ANGIOGENESIS	35	0.618795	1.75282	0.00432683	0.015453	0.00975977	2364	tags=51%, list=14%, signal=44%	5104/3764/7448/2260/6781/6372/1281/11167/7076/4060/4023/6578/1462/1290/7056/8829/5196/6275
HALLMARK_HYPOXIA	HALLMARK_HYPOXIA	HALLMARK_HYPOXIA	189	0.404789	1.5059	0.00484547	0.0161516	0.010201	3943	tags=41%, list=23%, signal=32%	3623/3036/229/3569/8406/1634/5837/1837/633/1843/7043/3486/5054/6781/1907/7538/9590/10570/5507/7436/51129/8660/1289/5260/7852/57007/10891/857/4015/5228/56925/6095/8609/2908/6515/596/6383/9469/2353/771/6275/7045/4502/10370/1466/54541/1356/3725/2113/9672/5066/5155/55076/133/272/3798/2645/10957/54206/7128/3340/8614/7162/23764/8987/2239/1316/694/3423/4627/58528/2745/5292/467/2152/2817/23645/6533
HALLMARK_TNFA_SIGNALING_VIA_NFKB	HALLMARK_TNFA_SIGNALING_VIA_NFKB	HALLMARK_TNFA_SIGNALING_VIA_NFKB	196	0.399502	1.49751	0.00540516	0.0168059	0.0106143	4280	tags=41%, list=25%, signal=31%	3569/9945/5806/1437/4616/3371/1843/2669/687/5054/9242/6372/388/8013/7538/7832/8660/1958/3624/150094/57007/9021/11080/2354/23258/3575/1960/10365/80176/604/3572/1052/969/1880/3164/3593/6515/6347/4929/2353/24147/3725/3726/7130/5142/1959/1847/10957/50486/8613/960/1906/5734/7128/65986/4973/23764/1435/3433/1827/8877/1316/694/1647/7185/467/2152/6648/23645/9516/5328/4792/7071/3976/2355/4783/5971/1051/520…
HALLMARK_INFLAMMATORY_RESPONSE	HALLMARK_INFLAMMATORY_RESPONSE	HALLMARK_INFLAMMATORY_RESPONSE	195	0.403622	1.5114	0.00571402	0.0168059	0.0106143	3696	tags=36%, list=22%, signal=29%	6869/6542/7432/3569/10242/1440/5732/6401/5054/6372/5739/6324/10316/7076/187/7832/2867/1236/3554/10630/1902/3678/5099/3624/114548/9180/3037/623/6506/558/3575/23166/6361/5996/3690/4323/969/1880/10203/3249/3593/6347/6402/8685/7130/2550/2014/5142/962/8578/728/929/133/23533/255488/1906/6004/5734/7162/4973/7439/4049/1435/3738/8877/1316/29933/3696/2357/3566/23601
HALLMARK_SPERMATOGENESIS	HALLMARK_SPERMATOGENESIS	HALLMARK_SPERMATOGENESIS	113	-0.395009	-1.49618	0.00964003	0.0254021	0.0160434	1676	tags=31%, list=10%, signal=28%	11073/54760/8624/419/157807/4225/3948/6847/9053/11004/7137/2146/10926/9133/1033/4751/83401/1080/6790/699/983/7272/23397/56/8852/4744/51087/1761/2571/4543/54514/83445/246/64180/7278
HALLMARK_MITOTIC_SPINDLE	HALLMARK_MITOTIC_SPINDLE	HALLMARK_MITOTIC_SPINDLE	194	-0.343883	-1.41302	0.0096528	0.0254021	0.0160434	2520	tags=22%, list=15%, signal=19%	23607/29901/7430/10565/3619/7531/3835/50628/9735/10128/4001/80119/10403/10051/1894/9055/163786/24137/55722/675/51203/26271/1063/5347/3832/29127/11004/9787/9133/54443/4751/6790/1062/699/983/56992/332/9493/22974/7272/9700/7153
